# Supplementary material for: Relationship between Physical Activity and Sedentary Behavior, Spinal Curvatures, Endurance and Balance of the Trunk Muscles-Extended Physical Health Analysis in Young Adults
Source: MDPI journal article supplement (doi:10.3390/ijerph20206938), 2023-10-18
Supplement: s1 [file s1]

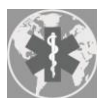

Supplementary Materials

# Relationship between Physical Activity and Sedentary Behavior, Spinal Curvatures, Endurance and Balance of the Trunk Muscles-Extended Physical Health Analysis in Young Adults

Verner Marijančić <sup>1</sup>, Tanja Grubić Kezele <sup>2,3,\*</sup>, Stanislav Peharec <sup>1</sup>, Nataša Dragaš-Zubalj <sup>4</sup>, Sandra Pavičić Žeželj <sup>5</sup> and Gordana Starčević-Klasan <sup>6</sup>

<sup>1</sup> Department of Physiotherapy, Faculty of Health Studies, University of Rijeka, 51000 Rijeka, Croatia; verner.marijancic@uniri.hr (V.M.); stanislav.peharec@fzsri.uniri.hr (S.P.)

<sup>2</sup> Department of Physiology, Immunology and Pathophysiology, Faculty of Medicine, University of Rijeka, 51000 Rijeka, Croatia

<sup>3</sup> Department of Clinical Microbiology, Clinical Hospital Rijeka, 51000 Rijeka, Croatia

<sup>4</sup> Department of School and University Medicine, Teaching Institute of Public Health of Primorje-Gorski Kotar County, 51000 Rijeka, Croatia; natasa.dragas-zubalj@zzjzpgz.hr

<sup>5</sup> Department of Health Ecology, Teaching Institute of Public Health of Primorje-Gorski Kotar County, 51000 Rijeka, Croatia; sandrapz@medri.uniri.hr

<sup>6</sup> Department of Basic Medical Science, Faculty of Health Studies, University of Rijeka, 51000 Rijeka, Croatia; gordanask@fzsri.uniri.hr

\* Correspondence: tanja.grubic@uniri.hr

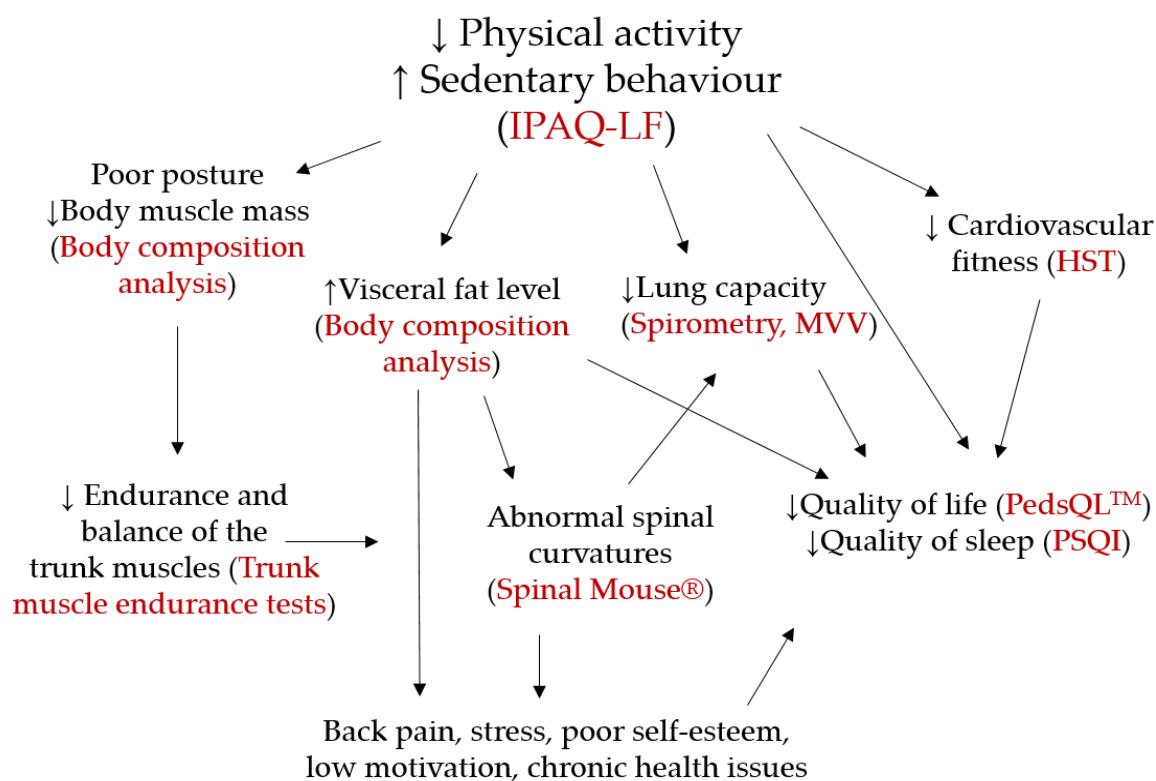

**Figure S1.** Interplay of possible consequences of low physical activity and sedentary behavior with accompanying measurement methods. IPAQ-LF, the International Physical Activity Questionnaire-Long Form; HST, Harvard step test; PedsQL™, Pediatric Quality of Life Inventory™; PSQI, Pittsburgh Sleep Quality Index; MVV, Maximal Voluntary Ventilation.

**Table S1.** Pearson correlation analysis for spinal curvatures vs. BMI, body composition, quality of life and sleep, endurance and balance of the trunk muscles, cardiovascular fitness and respiratory function.

| N = 82                              |                                                    | Spinal curvatures                                |
|-------------------------------------|----------------------------------------------------|--------------------------------------------------|
| Variable                            | Thoracic kyphosis angle - straight posture (°) r/p | Lumbar lordosis angle - straight posture (°) r/p |
| <b>BMI (kg/m<sup>2</sup>)</b>       | 0.026/0.849                                        | -0.167/0.216                                     |
| <b>Body composition</b>             |                                                    |                                                  |
| Visceral fat level                  | 0.084/0.535                                        | -0.209/0.121                                     |
| Body fat (%)                        | -0.140/0.302                                       | 0.277/0.038*                                     |
| Muscle mass (%)                     | 0.143/0.293                                        | -0.284/0.034*                                    |
| <b>Quality of life (PedsQL™)</b>    |                                                    |                                                  |
| Physical health                     | 0.191/0.159                                        | -0.017/0.899                                     |
| Psychosocial health                 | 0.002/0.985                                        | 0.068/0.615                                      |
| Total score                         | 0.077/0.568                                        | 0.044/0.745                                      |
| <b>Sleep quality (PSQI)</b>         | -0.012/0.925                                       | 0.017/0.897                                      |
| <b>Trunk muscle endurance</b>       |                                                    |                                                  |
| Trunk flexor test (sec)             | -0.128/0.346                                       | -0.142/0.297                                     |
| Trunk extensor test (sec)           | -0.132/0.331                                       | 0.264/0.049*                                     |
| Trunk extensor/flexor test ratio    | 0.002/0.985                                        | 0.323/0.015*                                     |
| <b>Cardiovascular fitness (HST)</b> | -0.180/0.182                                       | -0.247/0.066                                     |
| <b>MVV (L/min) (Spirometry)</b>     | 0.102/0.451                                        | -                                                |
|                                     | 0.289/0.030*                                       |                                                  |

\*statistical significance; BMI, Body Mass Index; N, number; r, Pearson correlation coefficient; p, level of statistical significance; PSQI, Pittsburgh Sleep Quality Index; PedsQL™, Pediatric Quality of Life Inventory™; HST, Harvard Step Test; MVV, Maximal Voluntary Ventilation.
